# Supplementary material for: Evaluating Large Spontaneous Deletions in a Bovine Cell Line Selected for Bovine Viral Diarrhea Virus Resistance
Source: MDPI journal article supplement (doi:10.3390/v13112147), 2021-10-25

**Table S1.** Gene names and ARS-UCD1.2 coordinates for the top three homozygous deletions in MDBK-CRIB cell line comparison.

| Affected<br>Genes<br>(Chr) | MDBK                     |              | CRIB                     |           |                          |              |
|----------------------------|--------------------------|--------------|--------------------------|-----------|--------------------------|--------------|
|                            | Haploid<br>region        | Size<br>(bp) | Haploid<br>region        | Size (bp) | Deleted<br>region        | Size<br>(bp) |
| <i>PTPN12</i><br>(4)       | na                       | na           | 43,526,464<br>43,673,345 | 146,882   | 43,615,698<br>43,649,505 | 33,808       |
| <i>GRID2</i><br>(6)        | 31,032,548<br>31,504,974 | 476,785      | 31,032,548<br>31,504,974 | 472,427   | 31,216,568<br>31,279,767 | 63,200       |
| <i>RABGAP1L</i><br>(16)    | na                       | na           | 55,960,038<br>56,221,837 | 261,800   | 56,060,044<br>56,129,427 | 69,384       |

Abbreviations: Chr, chromosome; bp, base pairs

### Figure S1. Integrative Genomics Viewer session showing MDBK+\_CRIB- BED file.

The BED file of MDBK cell reads mapping to regions of the genome not covered by reads from CRIB (BED file named “MDBK+\_CRIB-.bed” marked with red \*) was manually screened with the Integrative Genomics Viewer (IGV). The red arrows mark the three regions in the reference genome where there were a significant number of reads from MDBK mapping to the repeat masked reference bovine genome and no reads from the CRIB. These denote the regions of the CRIB genome containing compound homozygous deletions.

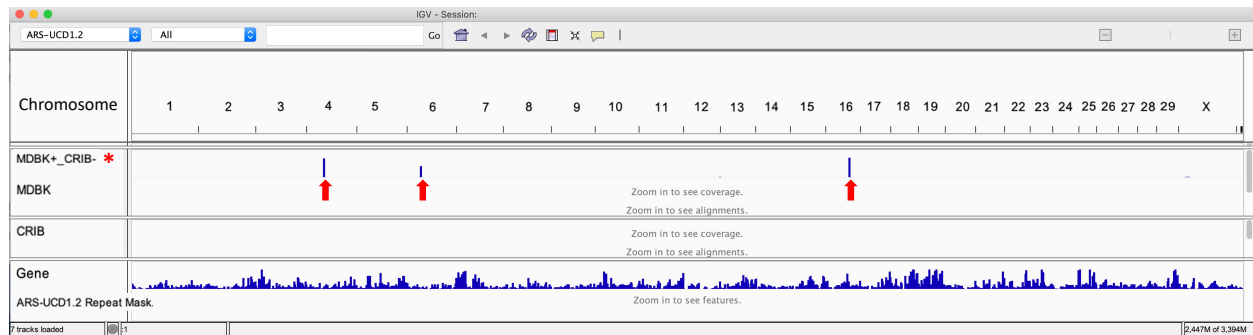

Supplement: s1 [file s1]
